# Supplementary material for: Exploring the Association between Air Pollution and Active School Transportation: Perceptions of Children and Youth in India
Source: MDPI journal article supplement (doi:10.3390/youth3040088), 2023-12-05
Supplement: s1 [file s1]

## Physical Activity Questionnaire

1. Average minutes spent in toilet (dressing, undressing, and showering):
  - a. 15
  - b. 30
  - c. 45
  - d. 60+
2. Average minutes spent in making bed:
  - a. 15
  - b. 30
  - c. 45
  - d. 60+
3. Average minutes spent having breakfast, lunch, dinner, and any other meal:
  - a. 15
  - b. 30
  - c. 45
  - d. 60+
4. Average minutes spent studying or doing homework at home/tuition daily:
  - a. 5
  - b. 30
  - c. 45
  - d. 60
  - e. 75
  - f. 90
  - g. 120+

### Which other activities do you do at school/ after school?

| Section Name | Activity Name                                                                                                                                                                   | Duration in actual minutes | Frequency/ week<br>1 / 2 / 3 / 4 / 5 / 6 / 7 |
|--------------|---------------------------------------------------------------------------------------------------------------------------------------------------------------------------------|----------------------------|----------------------------------------------|
| Inactivity   | Chatting with friends                                                                                                                                                           |                            |                                              |
|              | Watching television                                                                                                                                                             |                            |                                              |
|              | Internet surfing (Facebook, Instagram, Youtube, reading news, etc.) on a desktop/laptop/tablet                                                                                  |                            |                                              |
|              | Internet surfing (e.g. Facebook, Snapchat, Instagram, Youtube, Tiktok, reading news, etc.) on a smartphone.<br><br><i>This does NOT include regular texting or gaming time.</i> |                            |                                              |
|              | Playing games on a desktop/laptop/gaming device/television                                                                                                                      |                            |                                              |
|              | Playing video games on a smartphone                                                                                                                                             |                            |                                              |
|              |                                                                                                                                                                                 |                            |                                              |

|                   |                                                       |  |  |
|-------------------|-------------------------------------------------------|--|--|
|                   | Playing video games on a handheld video game console  |  |  |
|                   | Work on desktop/laptop/tablet                         |  |  |
|                   | Texting/whatsapp using a smartphone                   |  |  |
| Light Activity    | Daily household work                                  |  |  |
|                   | Reading                                               |  |  |
|                   | Doll games                                            |  |  |
|                   | Playing board games/Sitting games                     |  |  |
|                   | Breathing yoga (eg. Pranayama)                        |  |  |
|                   | Light walking                                         |  |  |
|                   | Mopping                                               |  |  |
|                   | Washing clothes                                       |  |  |
|                   | Cooking                                               |  |  |
|                   | Taking care of siblings                               |  |  |
| Moderate activity | Running games                                         |  |  |
|                   | Garden games (slides/jungle gym)                      |  |  |
|                   | Cycling                                               |  |  |
|                   | Swimming                                              |  |  |
|                   | Jump ropes                                            |  |  |
|                   | Brisk walking                                         |  |  |
|                   | Yoga (physical practices such as Ashtanga or Vinyasa) |  |  |
|                   | Collecting water from well                            |  |  |
|                   | Plucking tea leaves                                   |  |  |
| Vigorous activity | Karate (Martial Arts)                                 |  |  |
|                   | Badminton                                             |  |  |
|                   | Football                                              |  |  |
|                   | Tennis                                                |  |  |
|                   | Baseball                                              |  |  |
|                   | Volleyball                                            |  |  |
|                   | Basketball                                            |  |  |
|                   | Aerobics                                              |  |  |
|                   | Weight training (e.g., push-ups, sit-ups)             |  |  |
|                   | Kho kho                                               |  |  |
|                   | Kabbaddi                                              |  |  |
|                   | Skating                                               |  |  |
|                   | Cricket                                               |  |  |
|                   | Horse Riding                                          |  |  |
|                   | Running                                               |  |  |
|                   | Golf /Squash                                          |  |  |
|                   | Dancing specify -                                     |  |  |

**School:**

1. Does your school organize physical activities before-school hours, during lunch hour, or after-school hours?
  - a. Yes
  - b. No
  - c. If yes, do you participate in them? \_\_\_\_\_
2. Can you use INDOOR physical activity areas at school between classes? (e.g., using dance studio or yoga space during lunch, spare periods)
  - a. Yes
  - b. No
  - c. I don't know
3. Can you use OUTDOOR physical activity areas at school between classes? (e.g., using playing field during lunch, spare periods)
  - a. Yes
  - b. No
  - c. I don't know
4. Does your school have:
  - a. Gymnasium(s) - Yes / No
  - b. Indoor facilities (e.g., dance studio, yoga room, fitness room) - Yes / No
  - c. Outdoor facilities (e.g., playing fields, paved activity areas) - Yes / No
5. Can you use physical activity equipment throughout the school day? (e.g., footballs, badminton racquets)
  - a. Yes
  - b. No
  - c. I don't know
6. Before or after school, can you use the following spaces at your school? (i.e., early mornings, evenings, weekends)
  - a. Gymnasium(s) - Yes / No
  - b. Indoor facilities (e.g., dance studio, yoga room, fitness room) - Yes / No
  - c. Outdoor facilities (e.g., playing fields, paved activity areas) - Yes / No
  - d. Equipment (e.g., Footballs, basketballs) - Yes / No
7. Does your school have sports/physical activity competitions with other schools? (E.g. Cricket, hockey, football)
  - a. Yes
  - b. No
  - c. If yes, do you participate? \_\_\_\_\_

**Family and Peers:**

1. Who do you play sports or do other physical activities with? Please select all that apply.
  - a. Parents
  - b. Siblings
  - c. Cousins/other family

- d. Neighbours
  - e. Peers/friends from school
  - f. Peers/friends from outside of school
  - g. Other (please specify): \_\_\_\_\_
2. How much do your parents or guardians encourage you to be physically active?
    - a. Strongly encourage
    - b. Sometimes encourage
    - c. Do not encourage
  3. How much do your parents or guardians support you in being physically active? (e.g., taking you to team games, buying you sporting equipment)
    - a. Strongly support
    - b. Sometimes support
    - c. Do not support
  4. Your closest friends are the friends you like to spend the most time with. How many of your closest friends are physically active?
    - a. None
    - b. 1 friend
    - c. 2 friends
    - d. 3 friends
    - e. 4 friends

**Perception of Environment:**

Please circle the answer that best applies to you and your neighborhood.

1. There is an air pollution problem in my city.
  - a. Strongly disagree
  - b. Somewhat disagree
  - c. Neither agree nor disagree
  - d. Somewhat agree
  - e. Strongly agree
2. Air pollution prevents me from being active outside.
  - a. Strongly disagree
  - b. Somewhat disagree
  - c. Neither agree nor disagree
  - d. Somewhat agree
  - e. Strongly agree
3. My parents restrict my outdoor activity because of air pollution.
  - a. Strongly disagree
  - b. Somewhat disagree
  - c. Neither agree nor disagree
  - d. Somewhat agree
  - e. Strongly agree
4. I take precautions against air pollution when I go outside/engage in outdoor physical activity.

- a. Strongly disagree
  - b. Somewhat disagree
  - c. Neither agree nor disagree
  - d. Somewhat agree
  - e. Strongly agree
5. There are footpaths on most of the streets in my neighborhood.
- a. Strongly disagree
  - b. Somewhat disagree
  - c. Neither agree nor disagree
  - d. Somewhat agree
  - e. Strongly agree
6. My neighborhood streets are well lit at night.
- a. Strongly disagree
  - b. Somewhat disagree
  - c. Neither agree nor disagree
  - d. Somewhat agree
  - e. Strongly agree
7. There are zebra crossings and pedestrian signals to help walkers cross busy streets in my neighborhood.
- a. Strongly disagree
  - b. Somewhat disagree
  - c. Neither agree nor disagree
  - d. Somewhat agree
  - e. Strongly agree
8. There are trees along the streets in my neighborhood.
- a. Strongly disagree
  - b. Somewhat disagree
  - c. Neither agree nor disagree
  - d. Somewhat agree
  - e. Strongly agree
9. There are attractive natural sights in my neighborhood (e.g., trees, parks, ponds, rivers).
- a. Strongly disagree
  - b. Somewhat disagree
  - c. Neither agree nor disagree
  - d. Somewhat agree
  - e. Strongly agree
10. There is so much traffic that it makes it difficult or unpleasant to walk in my neighborhood.
- a. Strongly disagree
  - b. Somewhat disagree
  - c. Neither agree nor disagree
  - d. Somewhat agree
  - e. Strongly agree

11. There is a high crime rate in my neighborhood.
  - a. Strongly disagree
  - b. Somewhat disagree
  - c. Neither agree nor disagree
  - d. Somewhat agree
  - e. Strongly agree
12. The crime rate in my neighborhood makes it unsafe to go on walks during the day.
  - a. Strongly disagree
  - b. Somewhat disagree
  - c. Neither agree nor disagree
  - d. Somewhat agree
  - e. Strongly agree
13. The crime rate in my neighborhood makes it unsafe to go on walks during the night.
  - a. Strongly disagree
  - b. Somewhat disagree
  - c. Neither agree nor disagree
  - d. Somewhat agree
  - e. Strongly agree
14. How far is your school from home?
  - a. <2km
  - b. <5km
  - c. <10km
  - d. 20km
  - e. 20km+
15. Do you ride your bike to school?
  - a. Yes (if yes, how often?)
    - i. One day per week
    - ii. 2-3 days per week
    - iii. 4-5 days per week
    - iv. 6-7 days per week
  - b. No
16. A) Do you walk to school?
  - a. Yes (if yes, how often?)
    - i. One day per week
    - ii. 2-3 days per week
    - iii. 4-5 days per week
    - iv. 6-7 days per week
  - b. No
17. If you do not bike or walk to school, please select your mode of transportation from home to school:
  - a. Parent's/family car
  - b. Bus
  - c. Auto rickshaw
  - d. Taxi

- e. Scooter/motor bicycle
- f. Other (please specify): \_\_\_\_\_
