# Supplementary material for: Exploring the Association between Air Pollution and Active School Transportation: Perceptions of Children and Youth in India
Source: MDPI journal article supplement (doi:10.3390/youth3040088), 2023-12-05
Supplement: s1 [file s1]

Archive with 1 entries (1 files):
- youth-2716695-supplementary.pdf
